# Supplementary material for: The association between serum vitamin A and NAFLD among US adults varied in different BMI groups: a cross-sectional study
Source: Royal Society of Chemistry journal article supplement (doi:10.1039/d2fo02204d), 2022-10-26
Supplement: d2fo02204d1.pdf [file d2fo02204d1.pdf]

**The flowchart of data filter of study participants in NHANES 2017-2018 (Supplemental Figure 1)**

|                                                                                                                                                                |      |
|----------------------------------------------------------------------------------------------------------------------------------------------------------------|------|
| Participants aged 12 years and over at enrollment for whom elastography measurements using the FibroScan® were allowed in the NHANES Mobile Examination Center | 6401 |
| <b>Inclusion criteria</b>                                                                                                                                      |      |
| Participants aged 18 years and over at enrollment for whom elastography measurements using the FibroScan® were allowed in the NHANES Mobile Examination Center | 5533 |
| <b>Exclusion criteria</b>                                                                                                                                      |      |
| 1) Ineligible elastography exam status                                                                                                                         | 258  |
| 2) Not done elastography exam status                                                                                                                           | 156  |
| 3) individuals who are infected with hepatitis B                                                                                                               | 28   |
| 4) individuals who are infected with hepatitis C                                                                                                               | 52   |
| 5) significant alcohol consumption (>30 g/day for male and >20 g/day for female)                                                                               | 84   |
| 6) individuals with incomplete value information on VA (retinol) concentration                                                                                 | 233  |
| Final adult sample sizes for analysis                                                                                                                          | 4723 |

**Supplemental Table 1. The number of subjects with complete data available for analysis, NHANES 2017-2018**

| Adults ( $\geq 18$ yr) | N     | Adults ( $\geq 18$ yr)           | N     | Adults ( $\geq 18$ yr) | N     |
|------------------------|-------|----------------------------------|-------|------------------------|-------|
| Serum VA               | 4 723 | Health insurance                 | 4 711 | Weight                 | 4 688 |
| CAP                    | 4 723 | BMI                              | 4 683 | WC                     | 4 546 |
| Sex                    | 4 723 | Cigarette use                    | 4 723 | Sleep time             | 4 674 |
| Age                    | 4 723 | Alcohol use                      | 4 454 | Sedentary activity     | 4 714 |
| Race                   | 4 723 | CRP                              | 4 654 | Fasting insulin        | 2 245 |
| PIR                    | 4 126 | Energy intake                    | 3 803 | Fasting glucose        | 2 278 |
| Education              | 4 675 | Moderate recreational activities | 4 723 | TG                     | 2 252 |

**Abbreviations:**

NAFLD: nonalcoholic fatty liver disease, VA: vitamin A, CAP: controlled attenuation parameter, PIR: the ratio of family income to poverty, BMI: body mass index, CRP: C-reactive protein, WC: waist

---

circumference, TG: triglycerides.

**Supplemental Table 2. Univariate analysis adjusted for sociodemographic variables and socioeconomic status variables, NHANES 2017-2018**

| NAFLD (CAP)                      | (N) Mean (95%CI)      | $\beta$ (95%CI)      | (N) % (95%CI)            | OR (95%CI)           |
|----------------------------------|-----------------------|----------------------|--------------------------|----------------------|
| BMI (%)                          |                       |                      |                          |                      |
| <25                              | (1257) 215 (212 ,219) | Ref.                 | (1257) 12.5 (9.2 ,15.8)  | Ref.                 |
| $\geq$ 25, <30                   | (1491) 256 (252 ,260) | 33.92 (29.73, 38.11) | (1491) 45.4 (40.9 ,49.8) | 4.98 (3.54, 7.00)    |
| $\geq$ 30                        | (1935) 299 (295 ,304) | 78.95 (73.69, 84.22) | (1935) 75.2 (71.2 ,79.2) | 21.56 (13.62, 34.13) |
| Cigarette use (%)                |                       |                      |                          |                      |
| <100 cigarettes in life          | (2834) 258 (255 ,262) | Ref.                 | (2834) 46.3 (43.8 ,48.7) | Ref.                 |
| $\geq$ 100 cigarettes in life    | (1889) 271 (266 ,275) | 5.49 (0.17, 10.82)   | (1889) 53.3 (49.5 ,57.1) | 1.11 (0.91, 1.36)    |
| Alcohol use (%)                  |                       |                      |                          |                      |
| Never or Rarely                  | (2550) 267 (262 ,272) | Ref.                 | (2550) 51.9 (48.7 ,55.0) | Ref.                 |
| Sometimes                        | (876) 257 (249 ,264)  | -6.94 (-17.16, 3.29) | (876) 43.9 (40.0 ,47.8)  | 0.79 (0.63, 1.00)    |
| Often                            | (1028) 263 (254 ,272) | -3.43 (-12.82, 5.97) | (1028) 48.1 (41.7 ,54.5) | 0.90 (0.65, 1.24)    |
| CRP (%)                          |                       |                      |                          |                      |
| Tertile1                         | (1538) 239 (234 ,244) | Ref.                 | (1538) 31.3 (26.4 ,36.2) | Ref.                 |
| Tertile2                         | (1559) 268 (263 ,274) | 24.43 (16.73, 32.13) | (1559) 52.9 (49.4 ,56.4) | 2.25 (1.68, 3.01)    |
| Tertile3                         | (1557) 285 (281 ,289) | 45.23 (39.63, 50.82) | (1557) 64.9 (61.7 ,68.0) | 4.29 (3.22, 5.70)    |
| Energy intake (%)                |                       |                      |                          |                      |
| Tertile1                         | (1263) 257 (252 ,261) | Ref.                 | (1263) 44.1 (40.3 ,48.0) | Ref.                 |
| Tertile2                         | (1268) 261 (257 ,266) | 3.33 (-2.29, 8.94)   | (1268) 47.9 (44.4 ,51.3) | 1.16 (0.97, 1.39)    |
| Tertile3                         | (1272) 269 (263 ,275) | 6.56 (0.51, 12.61)   | (1272) 53.2 (50.0 ,56.4) | 1.33 (1.11, 1.59)    |
| Moderate recreational activities |                       |                      |                          |                      |
| Yes                              | (1937) 258 (253 ,263) | Ref.                 | (1937) 44.8 (41.5 ,48.1) | Ref.                 |
| No                               | (2786) 268 (265 ,271) | 8.26 (3.10, 13.43)   | (2786) 52.9 (50.5 ,55.4) | 1.33 (1.14, 1.56)    |

---

**Data in the table:**

Univariate analysis: adjusted for sociodemographic variables including Sex, Race and Age + socioeconomic status variables including PIR, Education, Health insurance.

For continuous variables: survey-weighted mean (95% CI), For categorical variables: survey-weighted percentage (95% CI), N: Number of observed, For CAP: survey-weighted  $\beta$  (95% CI), For liver steatosis: survey-weighted OR (95% CI).

**Abbreviations:**

CI: 95% confidence interval, OR: odds ratio, BMI: body mass index, PIR: the ratio of family income to poverty, CAP: controlled attenuation parameter, CRP: C-reactive protein.

---

**Supplemental Table 3. Associations between serum VA and NAFLD among US adults in sensitivity analysis, NHANES 2017-2018**

| >=18 yr Adults              |                         |                   |                          |                   |
|-----------------------------|-------------------------|-------------------|--------------------------|-------------------|
| Factors                     | Complete exam (n=4 385) |                   | 95% population (n=4 488) |                   |
|                             | $\beta$ (95%CI)         | OR (95%CI)        | $\beta$ (95%CI)          | OR (95%CI)        |
| Serum VA<br>(per-SD change) | 3.00 (1.31, 4.70)       | 1.20 (1.10, 1.32) | 3.01 (1.21, 4.81)        | 1.17 (1.07, 1.28) |
| Subgroups                   |                         |                   |                          |                   |
| Tertile1                    | Ref.                    | Ref.              | Ref.                     | Ref.              |
| Tertile2                    | 5.72 (0.53, 10.91)      | 1.19 (0.97, 1.46) | 4.18 (-0.94, 9.30)       | 1.10 (0.87, 1.39) |
| Tertile3                    | 8.66 (5.04, 12.28)      | 1.51 (1.22, 1.86) | 7.49 (3.56, 11.42)       | 1.35 (1.08, 1.69) |

**Data in the table:**

$\beta$ : CAP; OR: NAFLD (CAP cut-off point of 263 dB/m)

Model: adjustment of sociodemographic variables including Sex, Race and Age + socioeconomic status variables including PIR, Education, Health insurance + health-related variables including BMI, Cigarette use, Alcohol use, CRP, Energy intake and Moderate recreational activities.

**Abbreviations:**

NAFLD: nonalcoholic fatty liver disease, CI: 95% confidence interval, OR: odds ratio, BMI: body mass index, PIR: the ratio of family income to poverty, CAP: controlled attenuation parameter, CRP: C-reactive protein, VA: vitamin A.

**Supplemental Table 4. Subgroup analyses between serum VA and NAFLD when stratified by WC tertile among US adults, NHANES 2017-2018**

|                             | WC tertile 1<br>(56.4-91.8) | WC tertile 2<br>(91.9-106.1) | WC tertile 3<br>(106.2-169.5) | P-interaction |
|-----------------------------|-----------------------------|------------------------------|-------------------------------|---------------|
| No.                         | 1511                        | 1518                         | 1517                          |               |
| CAP (dB/m)                  | $\beta$ (95%CI)             | $\beta$ (95%CI)              | $\beta$ (95%CI)               |               |
| Serum VA<br>(per-SD change) | <b>8.46 (4.93, 12.00)</b>   | 1.43 (-1.99, 4.85)           | 0.56 (-3.43, 4.55)            | 0.0059        |
| Subgroups                   |                             |                              |                               | 0.0338        |
| Tertile1                    | Ref.                        | Ref.                         | Ref.                          |               |
| Tertile2                    | 4.32 (-2.84, 11.49)         | 5.47 (-7.66, 18.60)          | 2.83 (-8.17, 13.82)           |               |
| Tertile3                    | <b>15.91 (8.71, 23.11)</b>  | 5.06 (-4.29, 14.40)          | 6.51 (-2.83, 15.86)           |               |
|                             |                             |                              |                               |               |
| CAP (%)                     | OR (95%CI)                  | OR (95%CI)                   | OR (95%CI)                    |               |
| Serum VA<br>(per-SD change) | <b>1.68 (1.26, 2.25)</b>    | 1.05 (0.88, 1.24)            | 1.17 (1.00, 1.37)             | 0.0081        |
| Subgroups                   |                             |                              |                               | 0.1748        |
| Tertile1                    | <b>Ref.</b>                 | Ref.                         | Ref.                          |               |
| Tertile2                    | <b>1.77 (1.17, 2.68)</b>    | 1.22 (0.76, 1.94)            | 0.78 (0.52, 1.18)             |               |
| Tertile3                    | <b>2.79 (1.73, 4.51)</b>    | 1.16 (0.69, 1.94)            | 1.33 (0.86, 2.04)             |               |

**Data in the table:**

The association between serum VA (per-SD or tertile increment) and the degree of NAFLD in three WC subgroups. Values were adjusted for Sex, Race, Age, PIR, Education, Health insurance, Cigarette use, Alcohol use, CRP, Energy intake and Moderate recreational activities.

**Abbreviations:**

CI: 95% confidence interval, OR: odds ratio, WC: waist circumference, PIR: the ratio of family income to poverty, CAP: controlled attenuation parameter, CRP: C-reactive protein, VA: vitamin A.

**Supplemental Table 5. Subgroup analyses between serum VA and NAFLD when stratified by weight tertile among US adults, NHANES 2017-2018**

|                             | Weight tertile 1<br>(36.2-70.8) | Weight tertile 2<br>(70.9-88.3) | Weight tertile 3<br>(88.4-242.6) | P-interaction |
|-----------------------------|---------------------------------|---------------------------------|----------------------------------|---------------|
| No.                         | 1555                            | 1567                            | 1566                             |               |
| CAP (dB/m)                  | $\beta$ (95%CI)                 | $\beta$ (95%CI)                 | $\beta$ (95%CI)                  |               |
| Serum VA<br>(per-SD change) | <b>8.15 (5.00, 11.30)</b>       | 1.04 (-2.80, 4.88)              | 1.24 (-3.89, 6.37)               | 0.0044        |
| Subgroups                   |                                 |                                 |                                  | 0.0013        |
| Tertile1                    | <b>Ref.</b>                     | Ref.                            | Ref.                             |               |
| Tertile2                    | 4.95 (-1.85, 11.76)             | 3.41 (-4.90, 11.72)             | 4.56 (-6.80, 15.92)              |               |
| Tertile3                    | <b>17.33 (12.24, 22.42)</b>     | 2.86 (-5.47, 11.20)             | 5.78 (-5.15, 16.71)              |               |
|                             |                                 |                                 |                                  |               |
| CAP (%)                     | <b>OR (95%CI)</b>               | OR (95%CI)                      | OR (95%CI)                       |               |
| Serum VA<br>(per-SD change) | <b>1.48 (1.19, 1.83)</b>        | 1.05 (0.87, 1.27)               | 1.21 (0.99, 1.47)                | 0.0650        |
| Subgroups                   |                                 |                                 |                                  | <0.0001       |
| Tertile1                    | <b>Ref.</b>                     | Ref.                            | Ref.                             |               |
| Tertile2                    | <b>1.77 (1.36, 2.32)</b>        | 0.99 (0.70, 1.41)               | 0.99 (0.65, 1.53)                |               |
| Tertile3                    | <b>2.45 (1.85, 3.25)</b>        | 1.07 (0.71, 1.62)               | 1.31 (0.78, 2.20)                |               |

**Data in the table:**

The association between serum VA (per-SD or tertile increment) and the degree of NAFLD in three weight subgroups. Values were adjusted for Sex, Race, Age, PIR, Education, Health insurance, Cigarette use, Alcohol use, CRP, Energy intake and Moderate recreational activities.

**Abbreviations:**

CI: 95% confidence interval, OR: odds ratio, PIR: the ratio of family income to poverty, CAP: controlled attenuation parameter, CRP: C-reactive protein, VA: vitamin A.

**Supplemental Figure 2. The spline smoothing plot of serum VA and CAP in different BMI groups among adults**

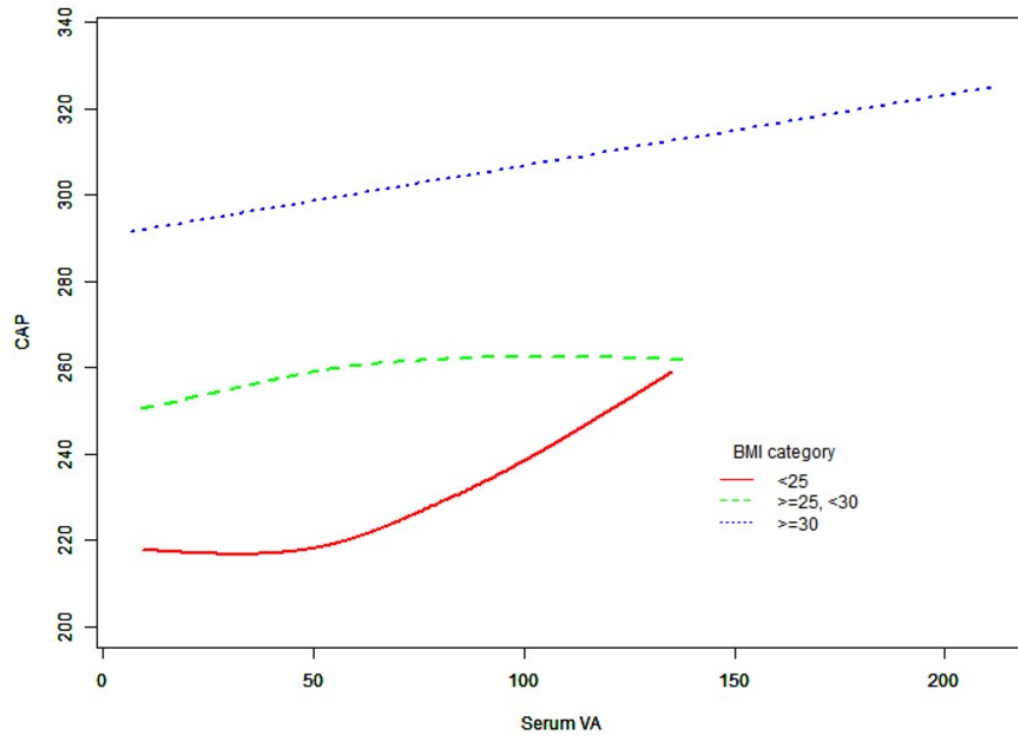

**Abbreviations:**

CAP: controlled attenuation parameter, VA: vitamin A.



**Supplemental Figure 3.** The scatter plot of dietary retinol intake and CAP among adults.

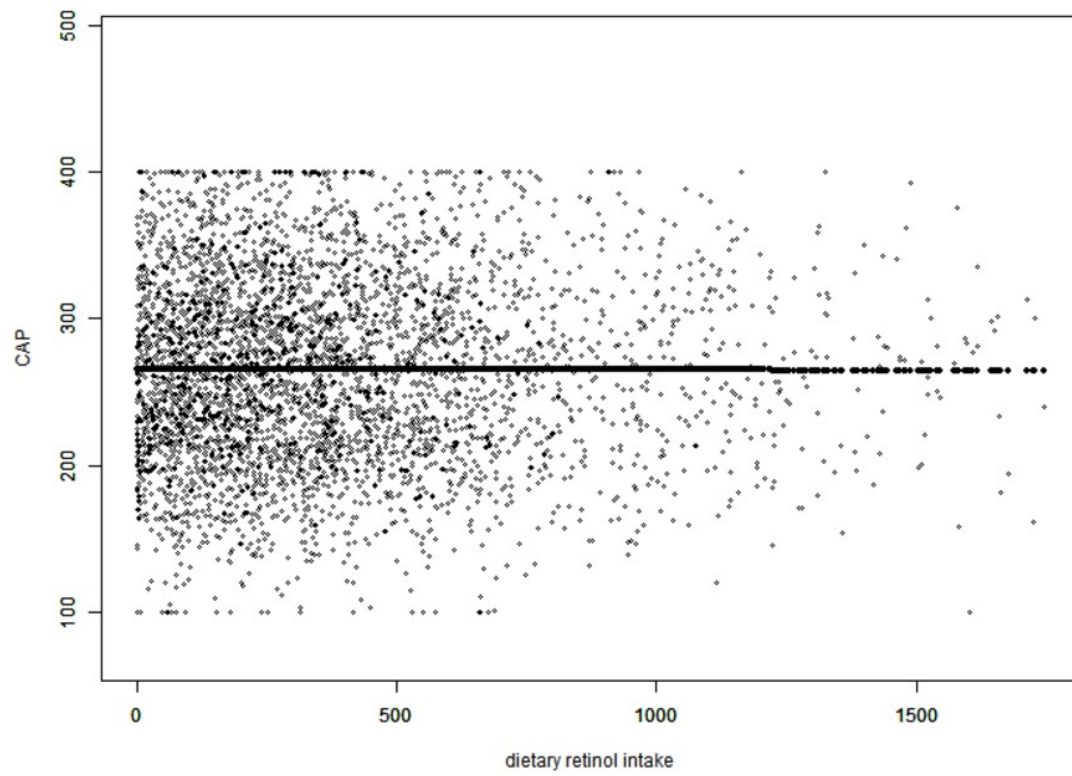

**Abbreviations:**

CAP: controlled attenuation parameter.
