# Supplementary figures and images for: The association between serum vitamin A and NAFLD among US adults varied in different BMI groups: a cross-sectional study
Source: Royal Society of Chemistry journal article supplement (doi:10.1039/d2fo02204d), 2022-10-26

Supplemental Figure 1. The flowchart of data filter of study participants in NHANES 2017-2018

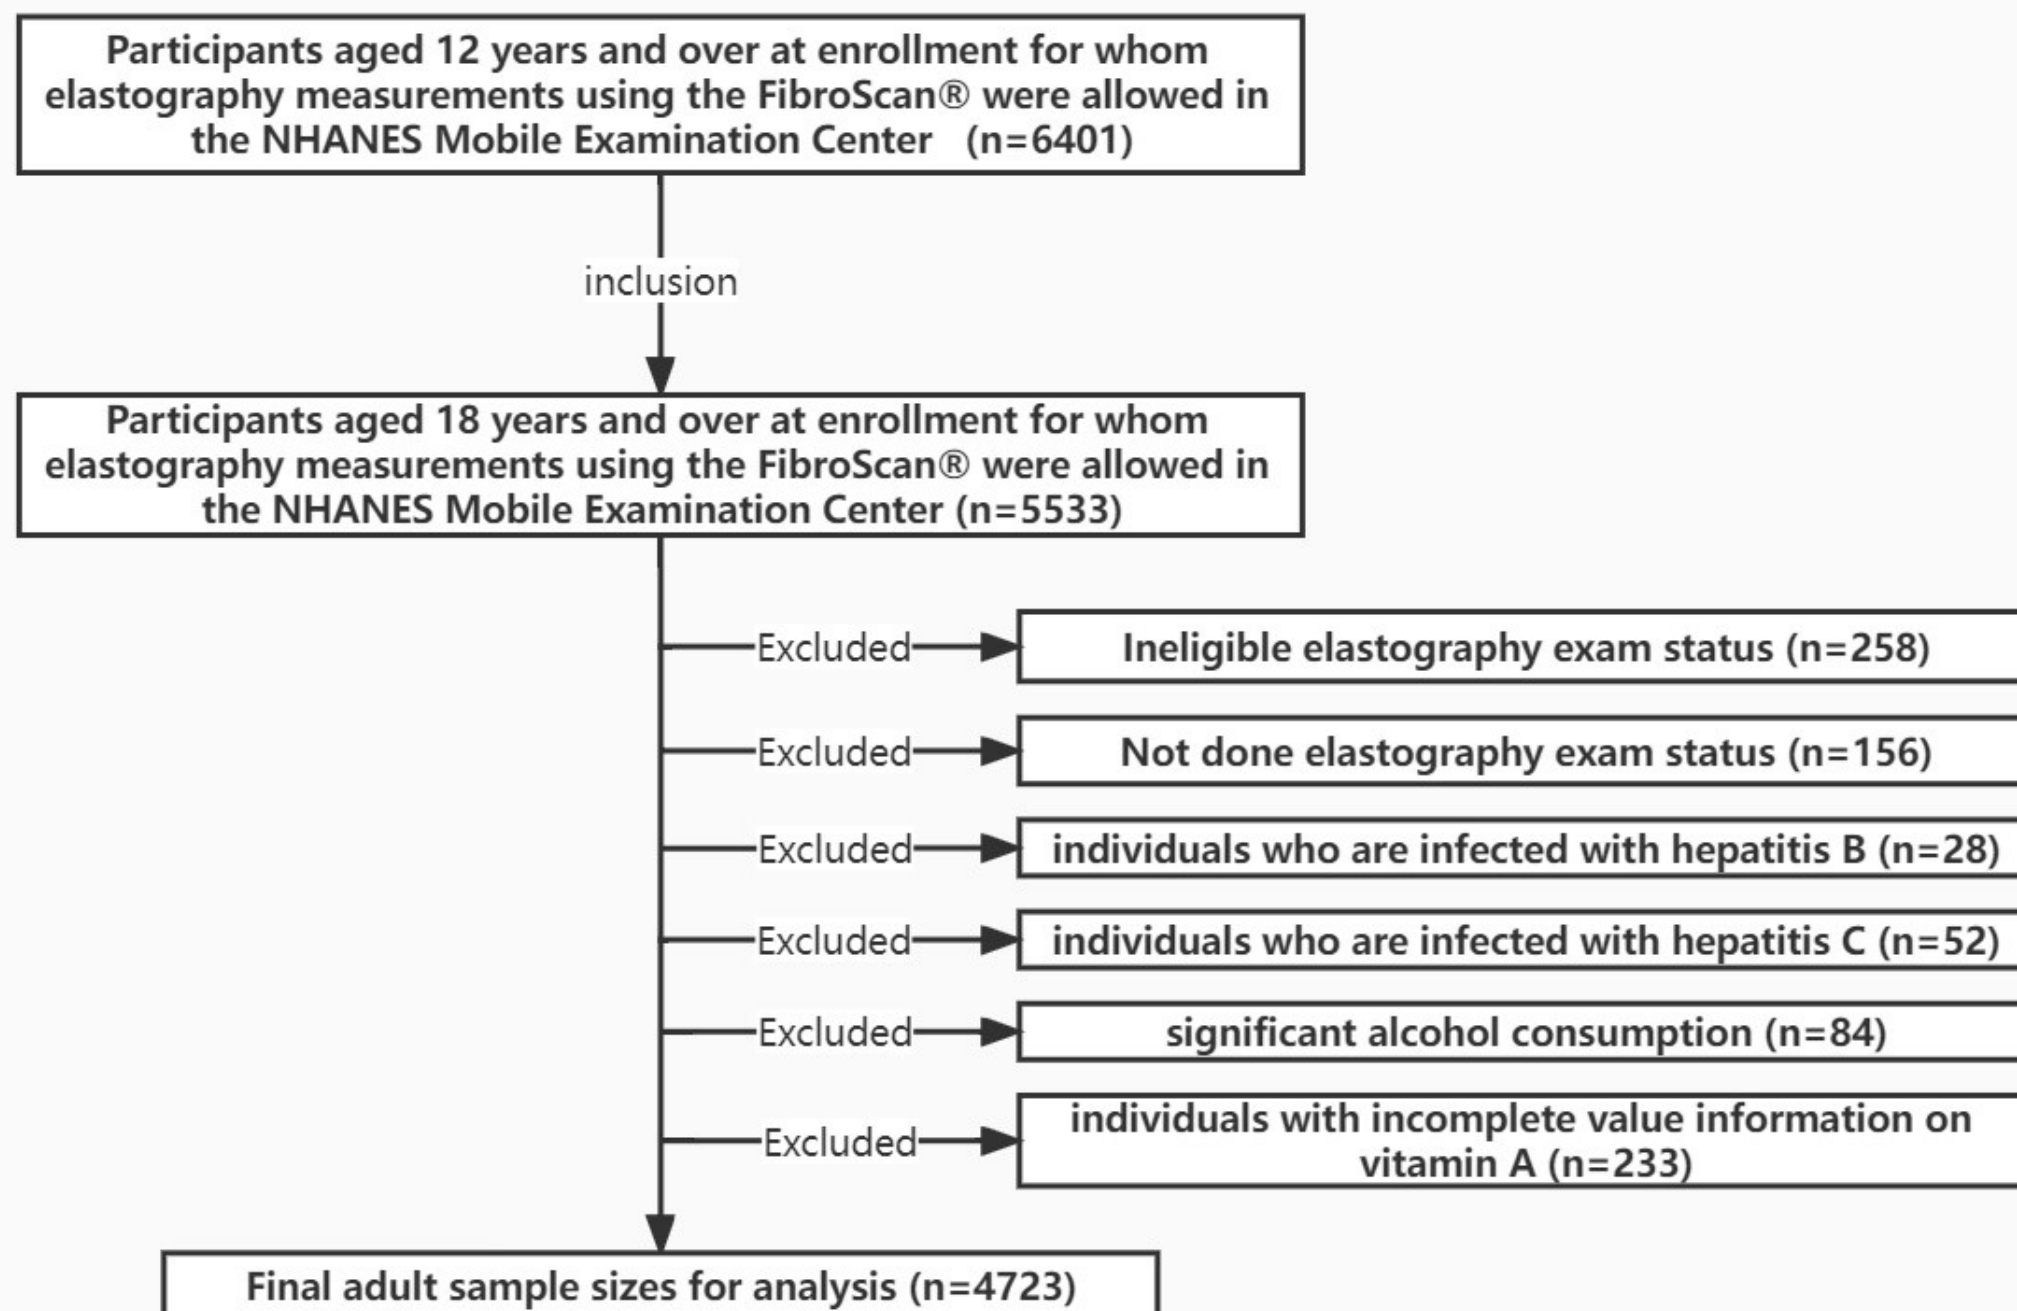

Supplement: d2fo02204d2.pdf [file d2fo02204d2.pdf]
